# Supplementary material for: Evolutionary history of a widespread tree species Acer mono in East Asia
Source: PubMed Central journal article supplement (PMC4267871; doi:10.1002/ece3.1278), 2014-10-27

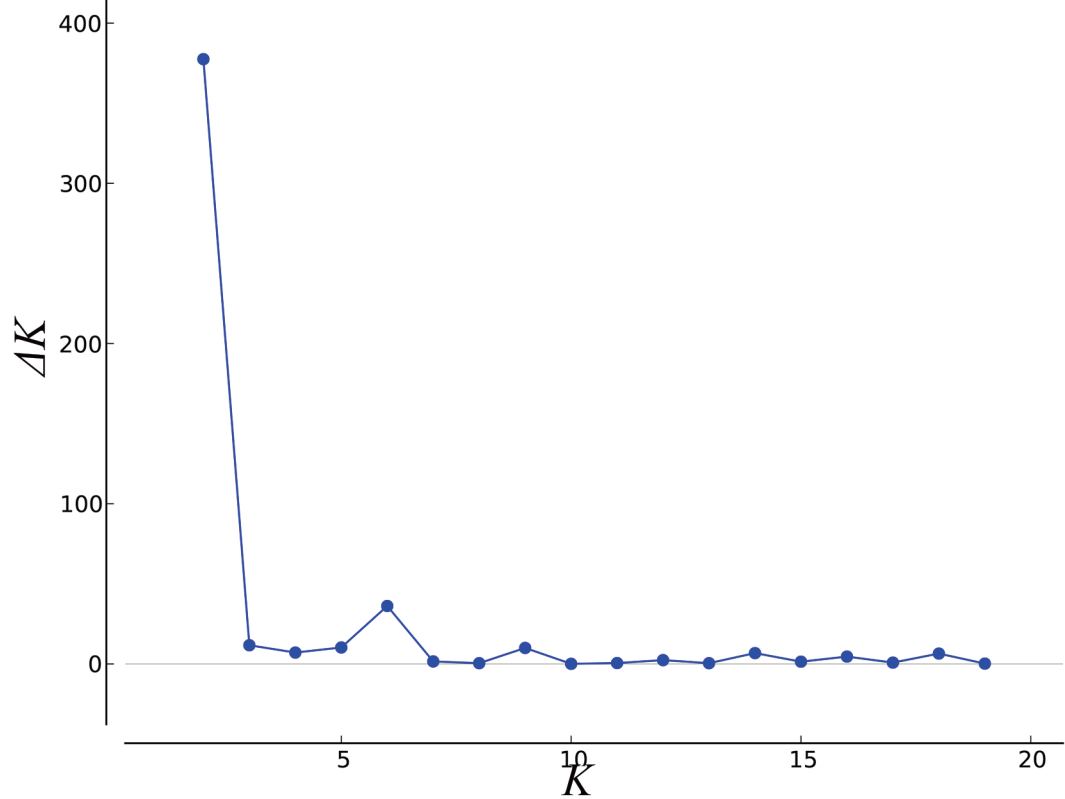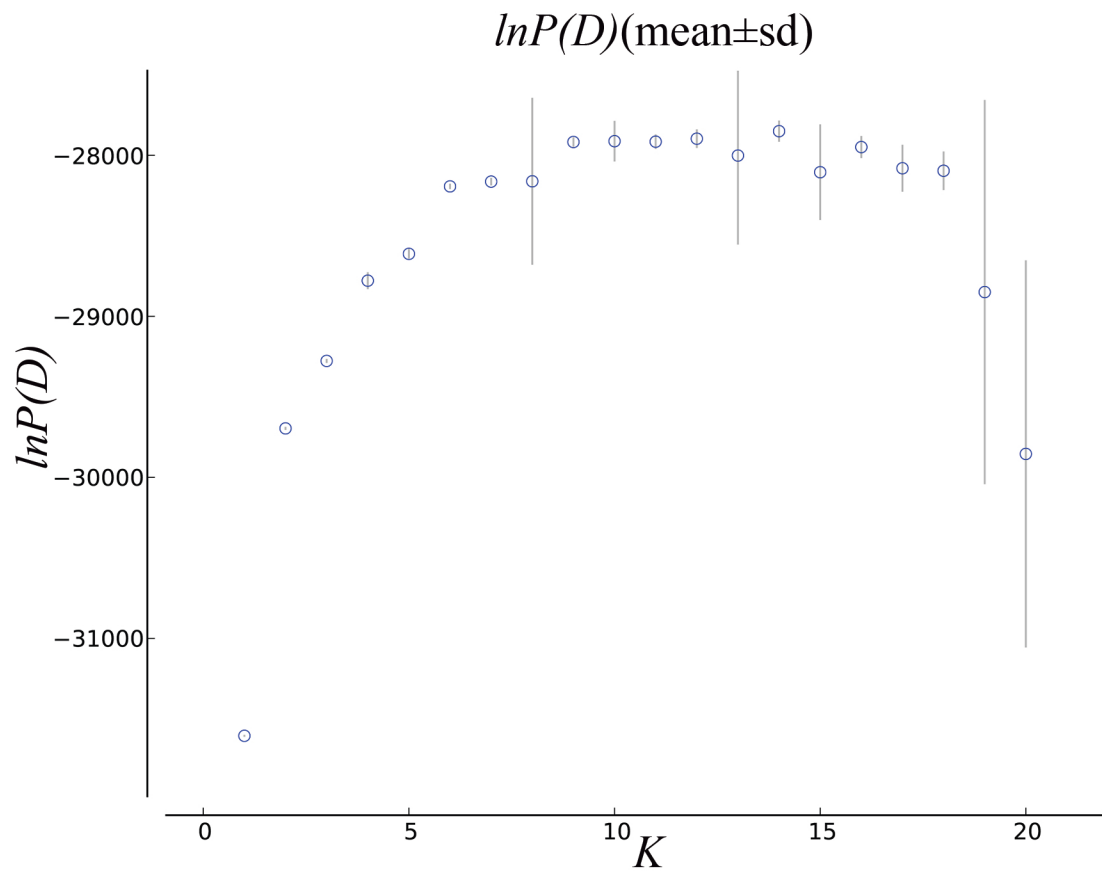

Supplement: ece30004-4332-SD1.pdf [file ece30004-4332-SD1.pdf]
